# Supplementary material
Source: publisher site journal article supplement (https://www.dovepress.com/article/523699)

**Supplementary Figure 1. CONSORT Diagram of Study Participation in Parent Study**


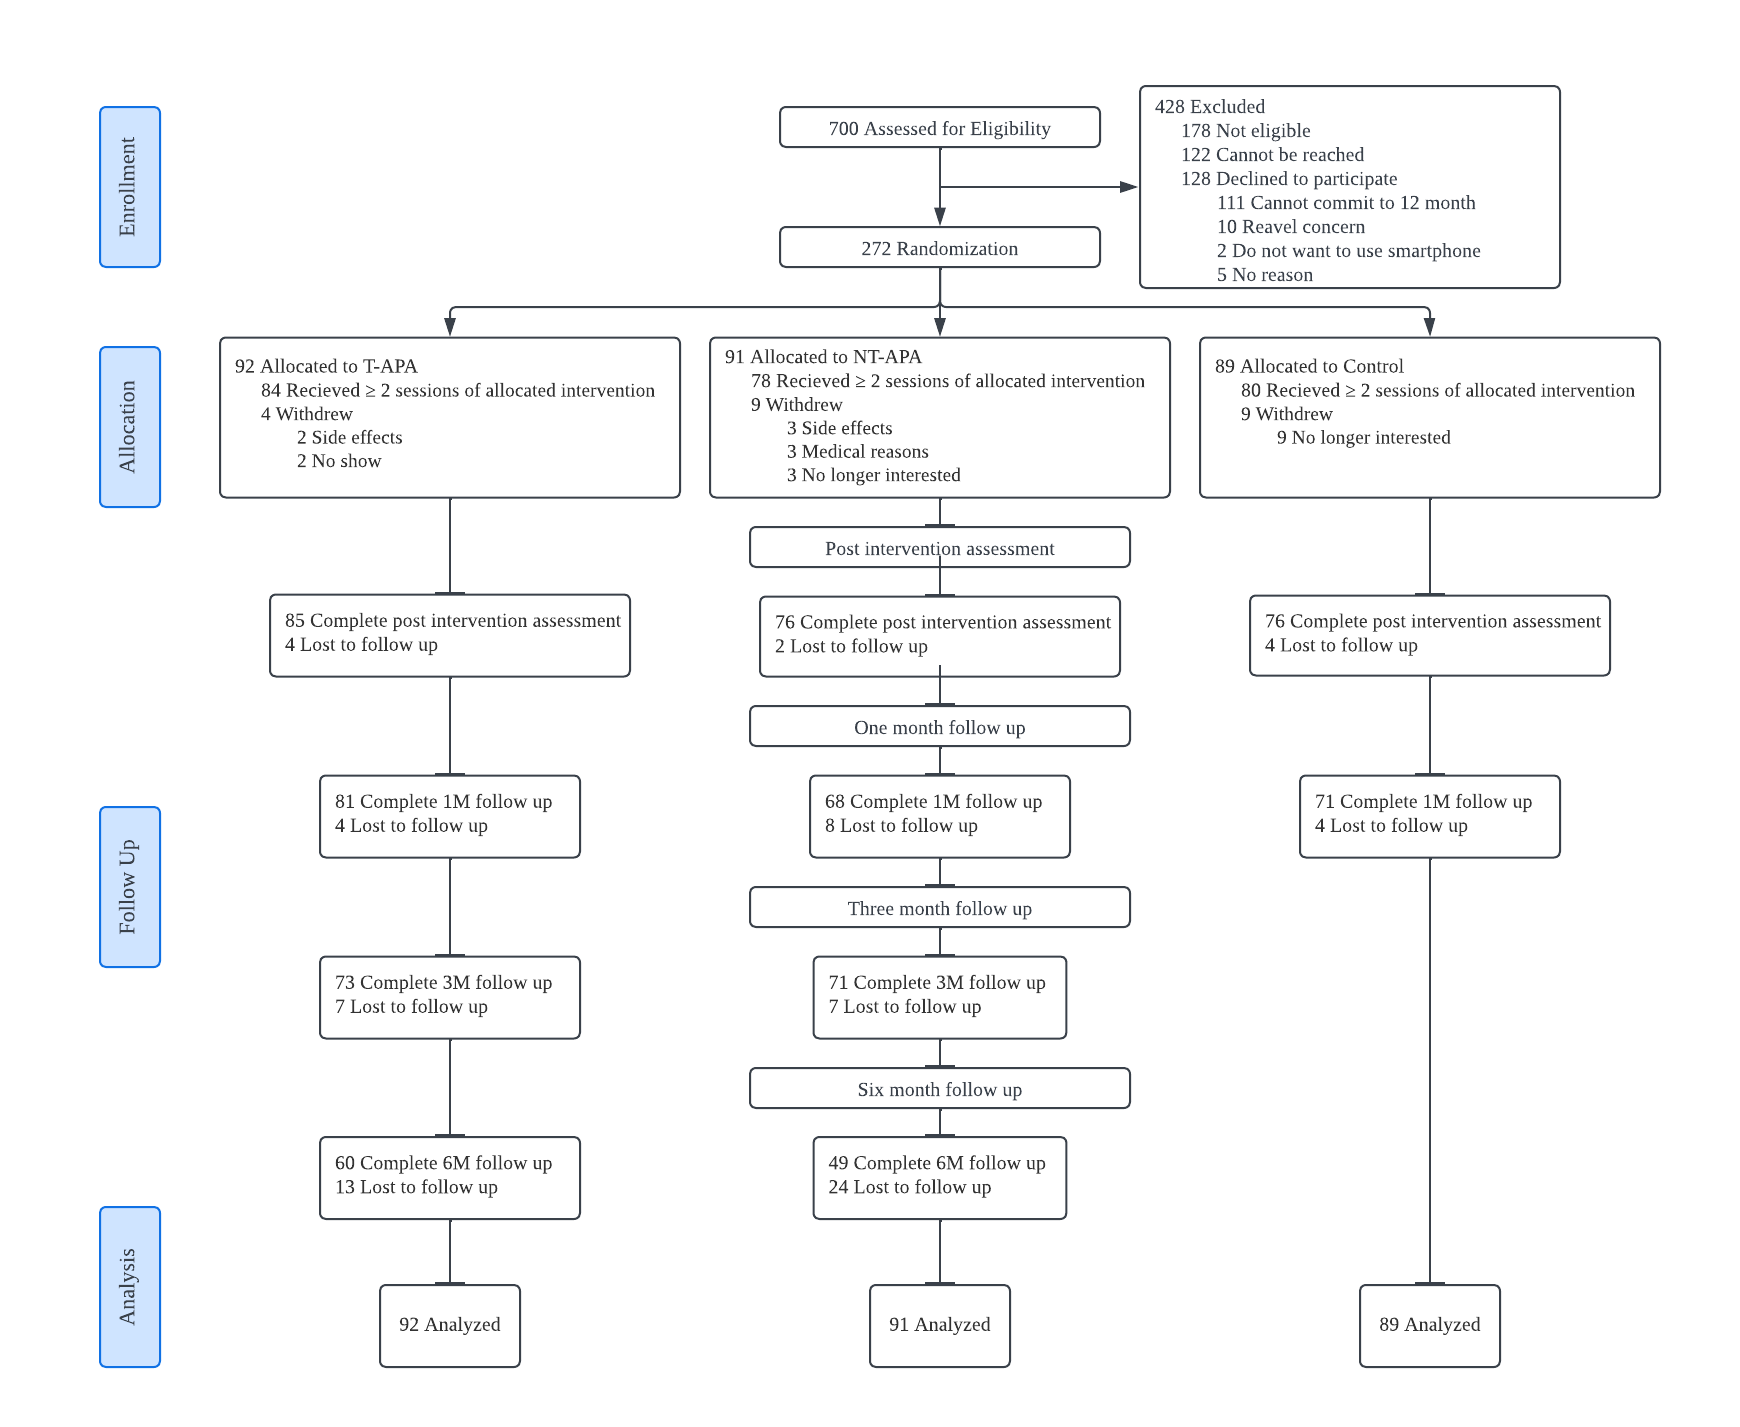

Supplement: Supplementary file 1 [file Supp%20fig%201.docx]
